# Supplementary material
Source: PubMed Central journal article supplement (PMC3884528)
Supplement: neo1512_1371SD1.pdf [file neo1512_1371SD1.pdf]

### A. Somatic point mutations

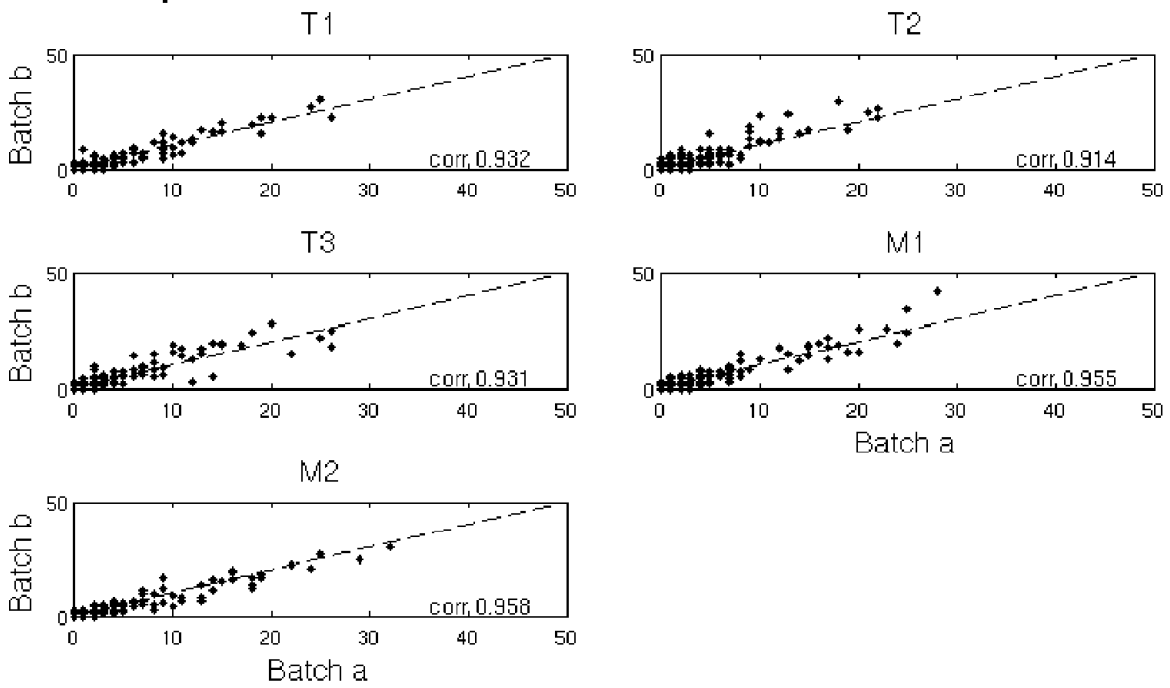

### B. Somatic indels

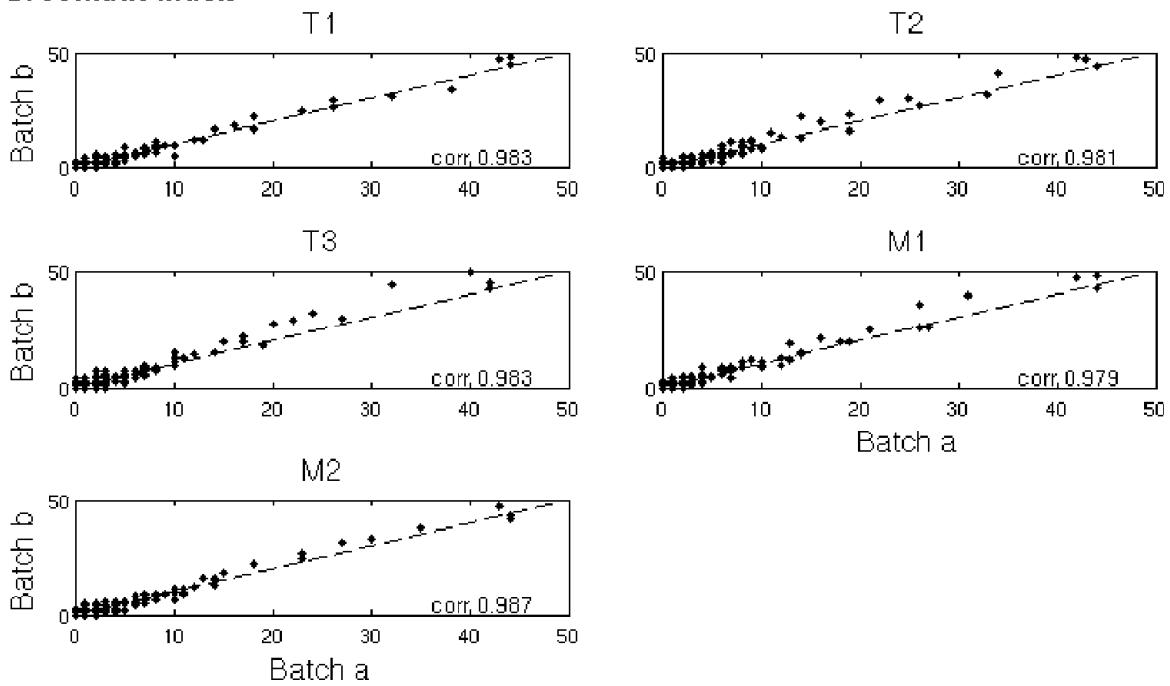

**Figure W1.** Number of somatic point mutations (A) and somatic indels (B) in sliding windows of size 500 kb between batch "a" and "b" samples. The x-axes are for the batch "a" samples, and the y-axes are for the batch "b" samples.
