# Supplementary material
Source: PubMed Central journal article supplement (PMC3884528)
Supplement: neo1512_1371SD2.pdf [file neo1512_1371SD2.pdf]

Supplemental Table 1. Exonic SPMs in protein-coding and untranslated genes.

| Chr | Gene            | Gene Function  | Position  | Mutation | Samples with Mutation |
|-----|-----------------|----------------|-----------|----------|-----------------------|
| 1   | OMA1            | protein coding | 58946658  | A>G      | T1                    |
| 1   | NBPF1           | protein coding | 16902784  | G>T      | T2, T3, M2            |
| 1   | NBPF14          | protein coding | 148010896 | C>G      | all                   |
| 1   | NBPF14          | protein coding | 148010901 | A>C      | all                   |
| 1   | HRNR            | protein coding | 152192327 | T>A      | T3, M1                |
| 1   | NBPF1           | protein coding | 16902780  | C>A      | T2, T3, M2            |
| 1   | NASP            | protein coding | 46073437  | C>T      | M1                    |
| 1   | IGSF3           | protein coding | 117158745 | A>C      | T1, T2, M1, M2        |
| 1   | IGSF3           | protein coding | 117158748 | A>G      | all                   |
| 2   | OTOF            | protein coding | 26700372  | C>T      | all                   |
| 2   | C2orf73         | protein coding | 54587553  | G>A      | all                   |
| 2   | ADD2            | protein coding | 70890768  | G>A      | T1                    |
| 2   | PABPC1P2        | untranslated   | 147345234 | C>T      | all                   |
| 2   | CHRNA1          | protein coding | 175618430 | G>A      | all                   |
| 2   | LOC151171       | untranslated   | 239460128 | C>T      | T1, T2                |
| 2   | KIF1A           | protein coding | 241727600 | G>A      | all                   |
| 2   | IFT172          | protein coding | 27667361  | C>T      | T3                    |
| 3   | ITIH4           | protein coding | 52857663  | C>T      | all                   |
| 3   | SUCLG2          | protein coding | 67659991  | C>T      | M1, M2                |
| 3   | C3orf77         | protein coding | 44284557  | G>A      | all                   |
| 3   | OR5H14          | protein coding | 97868487  | A>T      | M1, M2                |
| 3   | MUC4            | protein coding | 195515194 | G>C      | T1, T2                |
| 4   | SH3BP2          | protein coding | 2833374   | G>T      | all                   |
| 4   | FAT4            | protein coding | 126371835 | G>A      | T3                    |
| 4   | SH3BP2          | protein coding | 2833373   | T>A      | all                   |
| 4   | OTOP1;OTO<br>P1 | protein coding | 4198894   | G>A      | T1                    |
| 4   | OTOP1           | protein coding | 4198897   | A>G      | T1                    |
| 4   | OTOP1           | protein coding | 4204194   | A>G      | T2, M2                |
| 4   | KCNIP4          | protein coding | 20852259  | G>C      | all                   |
| 5   | AMACR           | protein coding | 33989382  | T>A      | all                   |
| 5   | DDX46           | protein coding | 134146945 | C>T      | M1, M2                |
| 5   | SLC45A2         | protein coding | 33944813  | C>T      | T2, T3, M1, M2        |
| 5   | KIAA0825        | protein coding | 93752964  | G>A      | all                   |
| 5   | PDGFRB          | protein coding | 149512490 | C>T      | all                   |
| 5   | DOCK2           | protein coding | 169188532 | G>C      | all                   |
| 6   | MUC21           | protein coding | 30954459  | G>C      | T3, M1                |
| 7   | TMEM140         | protein coding | 134849525 | G>A      | all                   |
| 7   | PAPOLB          | protein coding | 4900509   | G>C      | T3                    |
| 7   | FZD9            | protein coding | 72849199  | G>A      | all                   |
| 7   | PRSS2           | protein coding | 142481353 | G>A      | M1, M2                |
| 7   | DPP6;DPP6       | protein coding | 154172024 | C>T      | all                   |
| 8   | RPL23AP53       | untranslated   | 162614    | A>G      | M1, M2                |
| 8   | FLJ10661        | untranslated   | 8090323   | G>A      | M1                    |
| 9   | LOC642236       | untranslated   | 68438597  | C>T      | all                   |
| 9   | TUBBP5          | untranslated   | 141069199 | A>G      | T1, T3, M1, M2        |

|    |                  |                |           |     |            |
|----|------------------|----------------|-----------|-----|------------|
| 9  | PRSS3            | protein coding | 33798052  | C>T | T3, M1, M2 |
| 10 | PCDH15           | protein coding | 55587209  | C>T | all        |
| 10 | FLJ46300         | untranslated   | 133605304 | G>A | all        |
| 11 | INPPL1           | protein coding | 71943698  | C>T | T2         |
| 11 | SF3B2            | protein coding | 65827308  | A>T | all        |
| 11 | ZNF202           | protein coding | 123596948 | G>C | T2         |
| 11 | LOC143666        | untranslated   | 574178    | A>G | all        |
| 11 | OR51L1           | protein coding | 5021024   | C>T | T3         |
| 11 | TECTA            | protein coding | 121060548 | G>A | T2, T3     |
| 12 | WDR66            | protein coding | 122361695 | T>G | all        |
| 13 | ANKRD20A9<br>P   | untranslated   | 19436166  | C>G | T1, T2, M2 |
| 13 | ANKRD20A9<br>P   | untranslated   | 19437235  | A>T | M1, M2     |
| 14 | TRAF3            | protein coding | 103336726 | C>T | all        |
| 15 | HERC2            | protein coding | 28517429  | G>A | T1, M2     |
| 15 | LOC646214        | untranslated   | 21932851  | A>G | T2, M1     |
| 15 | LOC503519        | untranslated   | 26378119  | G>A | all        |
| 15 | LOC1005068<br>74 | untranslated   | 85122517  | A>T | T1, T2, M2 |
| 16 | PMFBP1           | protein coding | 72153820  | C>A | M1, M2     |
| 17 | DHX8             | protein coding | 41598878  | C>T | all        |
| 17 | MYH10            | protein coding | 8434001   | T>A | M1, M2     |
| 17 | KRTAP4-11        | protein coding | 39274291  | T>C | T3, M1, M2 |
| 18 | ANKRD20A5<br>P   | untranslated   | 14226328  | C>G | M1, M2     |
| 18 | LOC339298        | untranslated   | 73835003  | C>G | M1, M2     |
| 19 | ZNF776           | protein coding | 58264776  | G>A | all        |
| 19 | MAP2K7           | protein coding | 7976169   | C>T | T2, T3     |
| 19 | HAMP             | protein coding | 35775900  | C>T | M1, M2     |
| 19 | ZNF14            | protein coding | 19823092  | C>T | all        |
| 19 | ZNF599           | protein coding | 35250883  | G>A | all        |
| 20 | JAG1             | protein coding | 10627665  | C>T | all        |
| 20 | MYLK2            | protein coding | 30419610  | C>T | all        |
| 20 | SNORA71D         | untranslated   | 37062565  | G>A | all        |
| 21 | DSCAM-AS1        | untranslated   | 41755879  | G>A | M1, M2     |
| 22 | SULT4A1          | protein coding | 44221961  | C>T | all        |

Supplemental Table 2. List of 55 cancer genes containing validated somatic mutations. The sample (T1, T2, T3, M1, M2) columns show whether the sample contains validated somatic mutations in the gene (1) or not (0).

| Gene Symbol | chr | Gene Start | Gene End  | Sample |    |    |    |    |
|-------------|-----|------------|-----------|--------|----|----|----|----|
|             |     |            |           | T1     | T2 | T3 | M1 | M2 |
| PBX1        | 1   | 164523821  | 164855300 | 0      | 0  | 0  | 0  | 1  |
| ABL2        | 1   | 179067462  | 179199819 | 0      | 0  | 0  | 0  | 1  |
| SETD2       | 3   | 47056900   | 47206467  | 0      | 0  | 0  | 1  | 0  |
| TRIM24      | 7   | 138143953  | 138275738 | 0      | 0  | 0  | 1  | 1  |
| MYST3       | 8   | 41785997   | 41910508  | 0      | 0  | 1  | 0  | 0  |
| EBF1        | 5   | 158121924  | 158527788 | 0      | 0  | 1  | 1  | 1  |
| PRDM16      | 1   | 2984732    | 3356185   | 0      | 1  | 0  | 0  | 0  |
| MAML2       | 11  | 95708762   | 96077382  | 0      | 1  | 0  | 0  | 0  |
| CCND3       | 6   | 41901671   | 42019095  | 0      | 1  | 1  | 1  | 1  |
| CDK6        | 7   | 92233235   | 92466908  | 0      | 1  | 1  | 1  | 1  |
| KIAA1549    | 7   | 138515126  | 138667064 | 0      | 1  | 1  | 1  | 1  |
| SEPT9 (MSF) | 17  | 75276492   | 75497674  | 0      | 1  | 1  | 1  | 1  |
| ZBTB16      | 11  | 113929315  | 114122398 | 1      | 0  | 0  | 0  | 0  |
| TPM4        | 19  | 16177317   | 16214813  | 1      | 0  | 0  | 1  | 0  |
| BCL10       | 1   | 85730931   | 85744771  | 1      | 0  | 1  | 0  | 0  |
| SRGAP3      | 3   | 9021275    | 9405737   | 1      | 0  | 1  | 1  | 1  |
| CDH11       | 16  | 64976656   | 65157101  | 1      | 1  | 0  | 0  | 1  |
| NSD1        | 5   | 176559026  | 176728216 | 1      | 1  | 0  | 1  | 0  |
| NFE2L2      | 2   | 178091323  | 178258425 | 1      | 1  | 1  | 0  | 1  |
| FIP1L1      | 4   | 54242810   | 55162439  | 1      | 1  | 1  | 0  | 1  |
| BRD3        | 9   | 136896963  | 136934657 | 1      | 1  | 1  | 0  | 1  |
| NOTCH2      | 1   | 120453176  | 120613240 | 1      | 1  | 1  | 1  | 1  |
| PDE4DIP     | 1   | 144835157  | 145077186 | 1      | 1  | 1  | 1  | 1  |
| NTRK1       | 1   | 156784432  | 156852642 | 1      | 1  | 1  | 1  | 1  |
| SDHC        | 1   | 161283047  | 161333984 | 1      | 1  | 1  | 1  | 1  |
| ALK         | 2   | 29414640   | 30145432  | 1      | 1  | 1  | 1  | 1  |
| EML4        | 2   | 42395490   | 42560688  | 1      | 1  | 1  | 1  | 1  |
| MSH2        | 2   | 47629108   | 47790450  | 1      | 1  | 1  | 1  | 1  |
| IGK@        | 2   | 89155874   | 89631436  | 1      | 1  | 1  | 1  | 1  |
| AFF3        | 2   | 100162718  | 100760201 | 1      | 1  | 1  | 1  | 1  |
| FHIT        | 3   | 59734036   | 61238133  | 1      | 1  | 1  | 1  | 1  |
| FOXP1       | 3   | 71002844   | 71634140  | 1      | 1  | 1  | 1  | 1  |
| LPP         | 3   | 187870072  | 188609460 | 1      | 1  | 1  | 1  | 1  |
| AFF4        | 5   | 132210071  | 132300326 | 1      | 1  | 1  | 1  | 1  |
| PDGFRB      | 5   | 149492400  | 149536423 | 1      | 1  | 1  | 1  | 1  |
| EGFR        | 7   | 55085714   | 55325313  | 1      | 1  | 1  | 1  | 1  |
| EZH2        | 7   | 148503475  | 148582413 | 1      | 1  | 1  | 1  | 1  |
| MLL3        | 7   | 151831010  | 152134090 | 1      | 1  | 1  | 1  | 1  |

|         |    |           |           |   |   |   |   |   |
|---------|----|-----------|-----------|---|---|---|---|---|
| RUNX1T1 | 8  | 92966203  | 93116514  | 1 | 1 | 1 | 1 | 1 |
| CD274   | 9  | 5449503   | 5471566   | 1 | 1 | 1 | 1 | 1 |
| NFIB    | 9  | 14080842  | 14399982  | 1 | 1 | 1 | 1 | 1 |
| ABL1    | 9  | 133588268 | 133764062 | 1 | 1 | 1 | 1 | 1 |
| ZMYM2   | 13 | 20531810  | 20666968  | 1 | 1 | 1 | 1 | 1 |
| KTN1    | 14 | 56045925  | 56152301  | 1 | 1 | 1 | 1 | 1 |
| IGH@    | 14 | 106031614 | 107289051 | 1 | 1 | 1 | 1 | 1 |
| CDH1    | 16 | 68770128  | 68870444  | 1 | 1 | 1 | 1 | 1 |
| GAS7    | 17 | 9812926   | 10102868  | 1 | 1 | 1 | 1 | 1 |
| NF1     | 17 | 29420945  | 29709905  | 1 | 1 | 1 | 1 | 1 |
| COL1A1  | 17 | 48259650  | 48279993  | 1 | 1 | 1 | 1 | 1 |
| MSI2    | 17 | 55332212  | 55758658  | 1 | 1 | 1 | 1 | 1 |
| ALO17   | 17 | 78233667  | 78371086  | 1 | 1 | 1 | 1 | 1 |
| BCL2    | 18 | 60789579  | 60988361  | 1 | 1 | 1 | 1 | 1 |
| RUNX1   | 21 | 36159098  | 37358047  | 1 | 1 | 1 | 1 | 1 |
| TMPRSS2 | 21 | 42835478  | 42904043  | 1 | 1 | 1 | 1 | 1 |
| IGL@    | 22 | 22379474  | 23266085  | 1 | 1 | 1 | 1 | 1 |

## References

- 1 Ewing, B. and Green, P. (1998) Base-calling of automated sequencer traces using phred. II. Error probabilities. *Genome Res*, **8**, 186-194.
- 2 Wang, K., Li, M. and Hakonarson, H. ANNOVAR: functional annotation of genetic variants from high-throughput sequencing data. *Nucleic Acids Res*, **38**, e164.
- 3 Abecasis, G.R., Auton, A., Brooks, L.D., DePristo, M.A., Durbin, R.M., Handsaker, R.E., Kang, H.M., Marth, G.T. and McVean, G.A. An integrated map of genetic variation from 1,092 human genomes. *Nature*, **491**, 56-65.
- 4 Yachida, S., Jones, S., Bozic, I., Antal, T., Leary, R., Fu, B., Kamiyama, M., Hruban, R.H., Eshleman, J.R., Nowak, M.A. *et al.* Distant metastasis occurs late during the genetic evolution of pancreatic cancer. *Nature*, **467**, 1114-1117.

**Supplement Table 3.** List of validated somatic mutations within 1000bp of cancer genes. The sample (T1, T2, T3, M1, M2) columns show whether the sample contains the mutation (1) or not (0).

| gene symbol | mutation type | position                             | T1 | T2 | T3 | M1 | M2 |
|-------------|---------------|--------------------------------------|----|----|----|----|----|
| PRDM16      | indel         | chr1:3319602-3319632 CCCTCCTCTGAGTCT | 0  | 1  | 0  | 0  | 0  |
| BCL10       | indel         | chr1:85732582-85732582 G>-           | 1  | 0  | 1  | 0  | 0  |
| NOTCH2      | SPM           | chr1:120514030-120514030 G>A         | 1  | 1  | 1  | 1  | 1  |
| NOTCH2      | indel         | chr1:120613197-120613199 AAC>-       | 1  | 0  | 1  | 1  | 1  |
| PDE4DIP     | SPM           | chr1:145052709-145052709 A>G         | 0  | 1  | 0  | 1  | 0  |
| PDE4DIP     | SPM           | chr1:144842657-144842657 T>A         | 0  | 0  | 1  | 1  | 0  |
| PDE4DIP     | SPM           | chr1:144840798-144840798 A>G         | 0  | 0  | 0  | 0  | 0  |
| PDE4DIP     | SPM           | chr1:145027068-145027068 A>T         | 0  | 0  | 0  | 0  | 0  |
| PDE4DIP     | indel         | chr1:144841031-144841033 CTT>-       | 1  | 0  | 1  | 1  | 1  |
| PDE4DIP     | indel         | chr1:144853557-144853562 AAGTAA>-    | 0  | 0  | 0  | 0  | 0  |
| PDE4DIP     | indel         | chr1:144991398-144991423 ACACACACACA | 1  | 0  | 1  | 0  | 0  |
| PDE4DIP     | indel         | chr1:145017838-145017847 TTCCTT>-    | 0  | 0  | 0  | 0  | 0  |
| PDE4DIP     | indel         | chr1:145024577-145024590 ACACACACACA | 0  | 0  | 0  | 0  | 0  |
| PDE4DIP     | indel         | chr1:145048154-145048154 G>-         | 1  | 1  | 1  | 1  | 1  |
| PDE4DIP     | indel         | chr1:145048529-145048529 C>-         | 1  | 1  | 1  | 1  | 1  |
| PDE4DIP     | indel         | chr1:145048529-145048530 ->CC        | 1  | 0  | 1  | 1  | 1  |
| PDE4DIP     | indel         | chr1:145054413-145054413 C>-         | 1  | 1  | 1  | 1  | 1  |
| PDE4DIP     | indel         | chr1:145070603-145070603 A>-         | 1  | 1  | 1  | 1  | 1  |
| PDE4DIP     | indel         | chr1:145070627-145070627 A>-         | 1  | 1  | 0  | 1  | 1  |
| PDE4DIP     | indel         | chr1:145073546-145073547 AG>-        | 1  | 1  | 1  | 1  | 1  |
| NTRK1       | SPM           | chr1:156842946-156842946 C>T         | 1  | 1  | 1  | 1  | 1  |
| SDHC        | SPM           | chr1:161294185-161294185 G>A         | 1  | 1  | 1  | 1  | 1  |
| PBX1        | indel         | chr1:164721444-164721449 TGTGTG>-    | 0  | 0  | 0  | 0  | 1  |
| ABL2        | SPM           | chr1:179146550-179146550 C>T         | 0  | 0  | 0  | 0  | 1  |
| ABL2        | SPM           | chr1:179089304-179089304 G>C         | 0  | 0  | 0  | 0  | 0  |
| ALK         | SPM           | chr2:29465287-29465287 T>C           | 0  | 0  | 0  | 1  | 1  |
| ALK         | SPM           | chr2:29978187-29978187 C>T           | 1  | 1  | 1  | 1  | 1  |
| EML4        | indel         | chr2:42547465-42547465 T>-           | 1  | 1  | 1  | 1  | 1  |
| MSH2        | indel         | chr2:47729626-47729629 ATGG>-        | 1  | 1  | 1  | 1  | 1  |
| IGK@        | SPM           | chr2:89295050-89295050 C>G           | 0  | 1  | 1  | 1  | 1  |
| IGK@        | SPM           | chr2:89297733-89297733 C>T           | 0  | 0  | 0  | 0  | 0  |
| IGK@        | indel         | chr2:89249676-89249676 T>-           | 1  | 1  | 1  | 0  | 1  |
| IGK@        | indel         | chr2:89249813-89249813 G>-           | 1  | 0  | 0  | 1  | 1  |
| IGK@        | indel         | chr2:89298152-89298156 ACACC>-       | 0  | 0  | 1  | 1  | 0  |
| AFF3        | SPM           | chr2:100461046-100461046 T>C         | 1  | 1  | 1  | 1  | 1  |
| AFF3        | indel         | chr2:100314438-100314441 TGTT>-      | 1  | 1  | 1  | 1  | 1  |
| NFE2L2      | SPM           | chr2:178130721-178130721 G>T         | 1  | 1  | 1  | 0  | 1  |
| SRGAP3      | SPM           | chr3:9115691-9115691 T>C             | 0  | 0  | 0  | 1  | 1  |
| SRGAP3      | indel         | chr3:9272552-9272561 AAAAGAAAAG>-    | 1  | 0  | 1  | 1  | 1  |
| SETD2       | SPM           | chr3:47065973-47065973 T>C           | 0  | 0  | 0  | 1  | 0  |
| FHIT        | SPM           | chr3:60291398-60291398 G>T           | 1  | 1  | 1  | 1  | 1  |
| FHIT        | SPM           | chr3:60015625-60015625 G>C           | 0  | 0  | 1  | 1  | 0  |
| FHIT        | SPM           | chr3:60811887-60811887 G>A           | 0  | 0  | 0  | 0  | 0  |

|          |       |                                      |   |   |   |   |   |
|----------|-------|--------------------------------------|---|---|---|---|---|
| FHIT     | SPM   | chr3:60289463-60289463 T>C           | 1 | 1 | 1 | 1 | 1 |
| FHIT     | indel | chr3:60520017-60520172 TTAGCCGGGCGC  | 0 | 0 | 0 | 0 | 0 |
| FHIT     | indel | chr3:60545482-60545485 GCAT>-        | 1 | 1 | 1 | 1 | 1 |
| FHIT     | indel | chr3:60274296-60274303 GTGTGTGT>-    | 0 | 1 | 0 | 0 | 0 |
| FOXP1    | indel | chr3:71362686-71362686 T>-           | 1 | 1 | 1 | 1 | 1 |
| LPP      | SPM   | chr3:188267504-188267504 C>T         | 1 | 1 | 1 | 1 | 1 |
| FIP1L1   | indel | chr4:54969762-54969763 GC>-          | 1 | 1 | 1 | 0 | 1 |
| AFF4     | SPM   | chr5:132235649-132235649 C>A         | 1 | 1 | 1 | 1 | 1 |
| PDGFRB   | SPM   | chr5:149512490-149512490 C>T         | 1 | 1 | 1 | 1 | 1 |
| EBF1     | SPM   | chr5:158180399-158180399 C>T         | 0 | 0 | 0 | 1 | 1 |
| EBF1     | indel | chr5:158249272-158249275 GGAC>-      | 0 | 0 | 1 | 0 | 1 |
| NSD1     | indel | chr5:176679796-176679796 C>-         | 1 | 1 | 0 | 1 | 0 |
| CCND3    | SPM   | chr6:41935228-41935228 T>C           | 0 | 1 | 1 | 1 | 1 |
| EGFR     | indel | chr7:55159541-55159544 ACAC>-        | 1 | 1 | 1 | 1 | 1 |
| CDK6     | SPM   | chr7:92306707-92306707 G>A           | 0 | 1 | 1 | 1 | 1 |
| TRIM24   | SPM   | chr7:138167346-138167346 G>A         | 0 | 0 | 0 | 1 | 1 |
| KIAA1549 | SPM   | chr7:138610490-138610490 C>A         | 0 | 1 | 1 | 1 | 1 |
| EZH2     | indel | chr7:148520745-148520745 T>-         | 1 | 1 | 1 | 1 | 1 |
| MLL3     | SPM   | chr7:152078131-152078131 G>A         | 0 | 0 | 0 | 0 | 0 |
| MLL3     | SPM   | chr7:151928407-151928407 C>T         | 0 | 0 | 1 | 1 | 1 |
| MLL3     | SPM   | chr7:152079940-152079940 G>T         | 1 | 0 | 0 | 1 | 0 |
| MLL3     | SPM   | chr7:151980383-151980383 A>G         | 0 | 0 | 0 | 0 | 0 |
| MLL3     | SPM   | chr7:151940427-151940427 G>A         | 0 | 0 | 0 | 1 | 0 |
| MLL3     | SPM   | chr7:151983556-151983556 A>G         | 0 | 0 | 0 | 0 | 0 |
| MLL3     | SPM   | chr7:152079794-152079794 G>T         | 0 | 0 | 0 | 1 | 0 |
| MLL3     | indel | chr7:151958091-151958094 GTAG>-      | 1 | 1 | 1 | 0 | 1 |
| MLL3     | indel | chr7:151972350-151972350 C>-         | 1 | 1 | 1 | 1 | 1 |
| MLL3     | indel | chr7:151976119-151976119 A>-         | 1 | 1 | 1 | 1 | 1 |
| MLL3     | indel | chr7:151978829-151978836 AAAAAAAAA>- | 0 | 0 | 0 | 0 | 0 |
| MLL3     | indel | chr7:151979215-151979218 AAAA>-      | 1 | 1 | 1 | 1 | 1 |
| MLL3     | indel | chr7:151979439-151979440 AA>-        | 1 | 1 | 1 | 1 | 1 |
| MLL3     | indel | chr7:151981003-151981007 AACTC>-     | 1 | 1 | 1 | 1 | 1 |
| MLL3     | indel | chr7:151986595-151986595 T>-         | 1 | 1 | 1 | 1 | 1 |
| MLL3     | indel | chr7:152100795-152100818 ACACATACACA | 1 | 0 | 0 | 0 | 0 |
| MLL3     | indel | chr7:152103531-152103534 AAA>-       | 1 | 1 | 1 | 1 | 1 |
| MLL3     | indel | chr7:152104757-152104757 A>-         | 1 | 1 | 1 | 1 | 1 |
| MLL3     | indel | chr7:152104782-152104784 AAA>-       | 1 | 1 | 1 | 1 | 1 |
| MLL3     | indel | chr7:152106492-152106495 AAGA>-      | 1 | 1 | 1 | 1 | 1 |
| MLL3     | indel | chr7:152109486-152109486 A>-         | 1 | 1 | 1 | 1 | 1 |
| MLL3     | indel | chr7:152111933-152111935 TTC>-       | 1 | 1 | 1 | 1 | 1 |
| MYST3    | indel | chr8:41804010-41804019 ATACACACAC>-  | 0 | 0 | 1 | 0 | 0 |
| RUNX1T1  | SPM   | chr8:92995116-92995116 A>T           | 1 | 1 | 1 | 1 | 1 |
| CD274    | SPM   | chr9:5468129-5468129 A>T             | 1 | 1 | 1 | 1 | 1 |
| NFIB     | SPM   | chr9:14313235-14313235 G>A           | 1 | 1 | 1 | 1 | 1 |
| ABL1     | SPM   | chr9:133617582-133617582 C>T         | 1 | 1 | 1 | 1 | 1 |
| ABL1     | indel | chr9:133684803-133684806 GAGT>-      | 1 | 1 | 1 | 1 | 1 |
| BRD3     | indel | chr9:136907769-136907770 AC>-        | 1 | 1 | 1 | 0 | 1 |

|         |       |                                      |   |   |   |   |   |
|---------|-------|--------------------------------------|---|---|---|---|---|
| MAML2   | SPM   | chr11:95771033-95771033 A>G          | 0 | 1 | 0 | 0 | 0 |
| ZBTB16  | SPM   | chr11:114037793-114037793 G>T        | 1 | 0 | 0 | 0 | 0 |
| ZMYM2   | SPM   | chr13:20595524-20595524 G>A          | 0 | 1 | 1 | 1 | 1 |
| ZMYM2   | indel | chr13:20629136-20629136 G>-          | 1 | 1 | 1 | 1 | 1 |
| KTN1    | indel | chr14:56113175-56113176 TC>-         | 1 | 1 | 1 | 1 | 1 |
| IGH@    | SPM   | chr14:106782048-106782048 T>A        | 1 | 0 | 1 | 0 | 1 |
| IGH@    | SPM   | chr14:106172904-106172904 C>G        | 0 | 0 | 0 | 0 | 0 |
| IGH@    | SPM   | chr14:106440767-106440767 A>G        | 0 | 0 | 0 | 0 | 0 |
| IGH@    | SPM   | chr14:106312723-106312723 C>T        | 0 | 1 | 1 | 1 | 1 |
| IGH@    | SPM   | chr14:106782132-106782132 C>G        | 0 | 0 | 0 | 1 | 0 |
| IGH@    | indel | chr14:106155518-106155554 CACACACACA | 1 | 0 | 0 | 1 | 0 |
| IGH@    | indel | chr14:106440795-106440890 TCTGTCCCCT | 0 | 0 | 0 | 0 | 0 |
| IGH@    | indel | chr14:106782023-106782023 C>-        | 1 | 1 | 1 | 1 | 1 |
| IGH@    | indel | chr14:106902128-106902128 G>-        | 0 | 1 | 0 | 1 | 1 |
| IGH@    | indel | chr14:107024556-107024557 GG>-       | 1 | 0 | 0 | 0 | 1 |
| IGH@    | indel | chr14:107148284-107148322 AGCATGGCC  | 0 | 1 | 0 | 0 | 1 |
| IGH@    | indel | chr14:107161695-107161695 G>-        | 0 | 0 | 0 | 1 | 0 |
| IGH@    | indel | chr14:107261784-107261787 TCAG>-     | 1 | 1 | 1 | 1 | 1 |
| IGH@    | indel | chr14:106372443-106372444 AG>-       | 1 | 1 | 1 | 1 | 1 |
| CDH11   | SPM   | chr16:65096284-65096284 G>C          | 1 | 1 | 0 | 0 | 1 |
| CDH1    | SPM   | chr16:68849960-68849960 G>A          | 1 | 1 | 1 | 1 | 1 |
| GAS7    | SPM   | chr17:9862901-9862901 G>A            | 1 | 1 | 1 | 1 | 1 |
| GAS7    | indel | chr17:9908456-9908479 GCGCACGCATGCA  | 1 | 1 | 1 | 0 | 1 |
| NF1     | SPM   | chr17:29653404-29653404 G>A          | 1 | 1 | 1 | 1 | 1 |
| COL1A1  | SPM   | chr17:48265653-48265653 C>T          | 1 | 1 | 1 | 1 | 1 |
| MSI2    | indel | chr17:55660849-55660849 C>-          | 1 | 1 | 1 | 1 | 1 |
| SEPT9   | indel | chr17:75480513-75480521 TGGTGATGG>-  | 0 | 1 | 1 | 1 | 1 |
| SEPT9   | indel | chr17:75480585-75480590 TGGTGA>-     | 0 | 0 | 0 | 0 | 0 |
| ALO17   | SPM   | chr17:78365227-78365227 C>T          | 1 | 1 | 1 | 1 | 1 |
| BCL2    | SPM   | chr18:60829737-60829737 G>T          | 1 | 1 | 1 | 1 | 1 |
| TPM4    | indel | chr19:16180119-16180120 GT>-         | 1 | 0 | 0 | 1 | 0 |
| TPM4    | indel | chr19:16180137-16180138 GT>-         | 1 | 0 | 0 | 1 | 0 |
| RUNX1   | SPM   | chr21:36478701-36478701 C>A          | 0 | 0 | 0 | 1 | 1 |
| RUNX1   | SPM   | chr21:36271357-36271357 C>T          | 1 | 1 | 1 | 1 | 1 |
| RUNX1   | indel | chr21:36435846-36435857 AAACACACACA  | 0 | 0 | 0 | 0 | 0 |
| RUNX1   | indel | chr21:36809539-36809541 CTT>-        | 1 | 1 | 1 | 1 | 1 |
| TMPRSS2 | indel | chr21:42897867-42897867 C>-          | 1 | 1 | 1 | 1 | 1 |
| IGL@    | SPM   | chr22:22656007-22656007 T>C          | 0 | 0 | 0 | 1 | 0 |
| IGL@    | SPM   | chr22:22997406-22997406 A>G          | 0 | 0 | 1 | 0 | 0 |
| IGL@    | SPM   | chr22:22644394-22644394 G>A          | 0 | 0 | 0 | 1 | 0 |
| IGL@    | SPM   | chr22:22646300-22646300 G>A          | 0 | 0 | 0 | 0 | 0 |
| IGL@    | SPM   | chr22:22644350-22644350 C>T          | 1 | 0 | 1 | 1 | 1 |
| IGL@    | SPM   | chr22:22616403-22616403 G>A          | 0 | 0 | 0 | 0 | 0 |
| IGL@    | indel | chr22:22537437-22537472 TAGCTAGCTAG  | 0 | 0 | 0 | 0 | 0 |
| IGL@    | indel | chr22:22641073-22641105 TCATCATTTCAT | 0 | 0 | 0 | 0 | 0 |
| IGL@    | indel | chr22:22704660-22704663 GCAA>-       | 1 | 1 | 1 | 1 | 1 |
| IGL@    | indel | chr22:22704995-22704995 C>-          | 1 | 1 | 1 | 1 | 1 |
